# Supplementary material
Source: publisher figshare collection journal article supplement (https://acs.figshare.com/ndownloader/files/5195341)
Supplement: Supplementary file 1 [file 5195341]

Supplementary Materials

EXCITED-STATE METAL-TO-LIGAND CHARGE TRANSFER DYNAMICS OF A  
RUTHENIUM(II) DYE IN SOLUTION AND ADSORBED ON TiO<sub>2</sub> NANOPARTICLES FROM  
RESONANCE RAMAN SPECTROSCOPY

Lian C. T. Shoute and Glen R. Loppnow

Department of Chemistry

University of Alberta

Edmonton, Alberta, CANADA

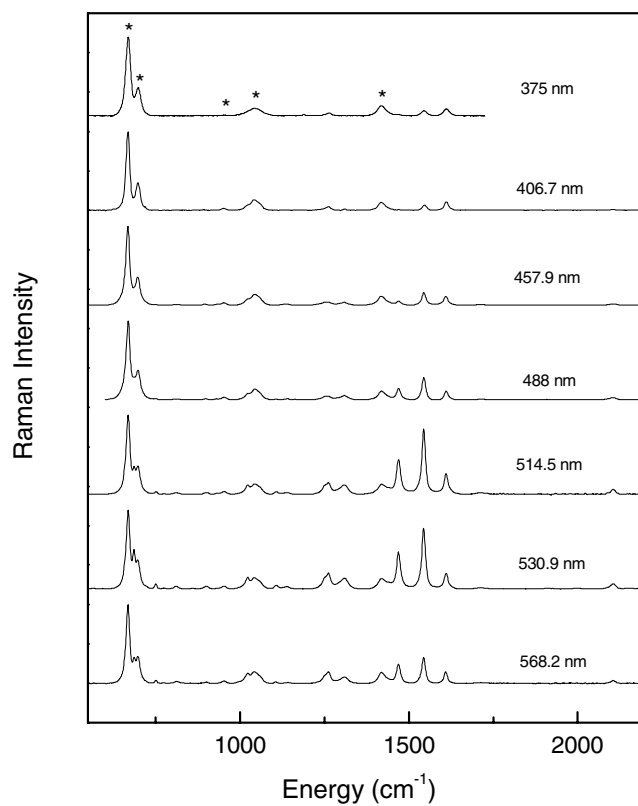

Figure 1s. Resonance Raman spectra with excitation wavelengths spanning the 400 and 544-nm absorption bands of N3 in DMSO. Asterisks (\*) indicates DMSO solvent peaks.

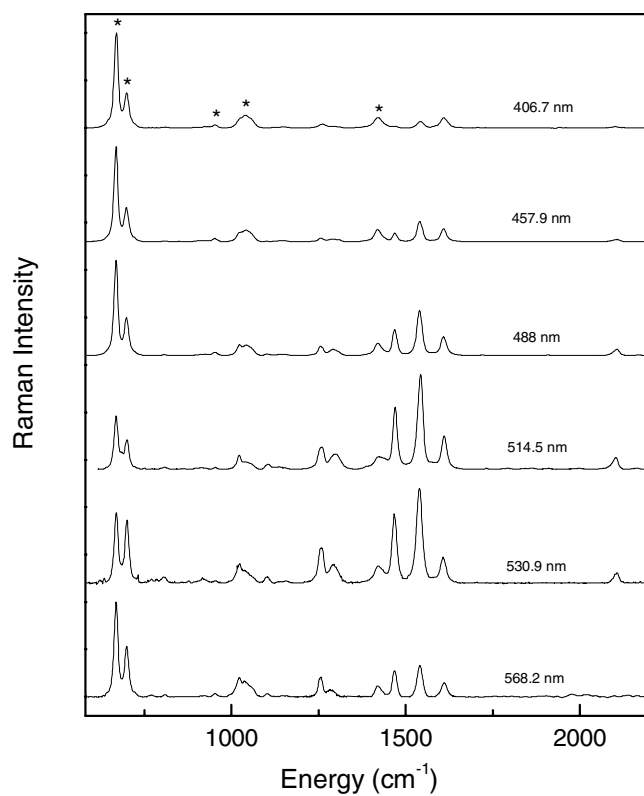

Figure 2s. Resonance Raman spectra with excitation wavelengths spanning the 400 and 544-nm absorption bands of N3/TiO<sub>2</sub> in DMSO. Asterisks (\*) indicates DMSO solvent peaks.
